# Supplementary material for: Applying Floodplain Inundation Modeling to Estimate Suitable Spawning Habitat and Recruitment Success for Alligator Gar in the Guadalupe River, Texas
Source: MDPI journal article supplement (doi:10.3390/hydrology10060123), 2023-05-31
Supplement: s1 [file s1]

Table S1. Spearman rank order correlation matrix of hydrologic metrics showing the correlation coefficient (Spearman's rho) and p-value in parenthesis.

|                 | April<br>Mean Q   | May<br>Mean Q     | June<br>Mean Q    | July<br>Mean Q    | 1-day<br>max      | 3-day<br>max      | 7-day<br>max      | 30-day<br>max     | 90-day<br>max     | April<br>Max Q    | April High<br>Flow Pulse # | April High Flow<br>Pulse Max CD |
|-----------------|-------------------|-------------------|-------------------|-------------------|-------------------|-------------------|-------------------|-------------------|-------------------|-------------------|----------------------------|---------------------------------|
| RYCS            | 0.501<br>(0.0068) | 0.156<br>(0.4230) | 0.413<br>(0.0289) | 0.612<br>(0.0006) | 0.402<br>(0.0338) | 0.387<br>(0.0418) | 0.378<br>(0.0470) | 0.486<br>(0.0091) | 0.477<br>(0.0106) | 0.456<br>(0.0150) | 0.399<br>(0.0354)          | 0.466<br>(0.0127)               |
| April<br>Mean Q |                   | 0.567<br>(0.0018) | 0.594<br>(0.0009) | 0.782<br>(0.0000) | 0.645<br>(0.0002) | 0.649<br>(0.0002) | 0.641<br>(0.0002) | 0.739<br>(0.0000) | 0.781<br>(0.0000) | 0.899<br>(0.0000) | 0.817<br>(0.0000)          | 0.918<br>(0.0000)               |
| May<br>Mean Q   |                   |                   | 0.727<br>(0.0000) | 0.592<br>(0.0010) | 0.649<br>(0.0002) | 0.644<br>(0.0002) | 0.672<br>(0.0001) | 0.73<br>(0.0000)  | 0.795<br>(0.0000) | 0.362<br>(0.0582) | 0.34<br>(0.0756)           | 0.512<br>(0.0055)               |
| June<br>Mean Q  |                   |                   |                   | 0.765<br>(0.0000) | 0.662<br>(0.0001) | 0.665<br>(0.0001) | 0.716<br>(0.0000) | 0.744<br>(0.0000) | 0.824<br>(0.0000) | 0.391<br>(0.0397) | 0.399<br>(0.0357)          | 0.583<br>(0.0012)               |
| July<br>Mean Q  |                   |                   |                   |                   | 0.729<br>(0.0000) | 0.725<br>(0.0000) | 0.737<br>(0.0000) | 0.818<br>(0.0000) | 0.893<br>(0.0000) | 0.615<br>(0.0005) | 0.557<br>(0.0022)          | 0.685<br>(0.0000)               |
| 1-day max       |                   |                   |                   |                   |                   | 0.997<br>(0.0000) | 0.987<br>(0.0000) | 0.947<br>(0.0000) | 0.891<br>(0.0000) | 0.616<br>(0.0005) | 0.419<br>(0.0267)          | 0.529<br>(0.0040)               |
| 3-day max       |                   |                   |                   |                   |                   |                   | 0.989<br>(0.0000) | 0.949<br>(0.0000) | 0.89<br>(0.0000)  | 0.614<br>(0.0005) | 0.409<br>(0.0308)          | 0.541<br>(0.0031)               |
| 7-day max       |                   |                   |                   |                   |                   |                   |                   | 0.962<br>(0.0000) | 0.913<br>(0.0000) | 0.579<br>(0.0013) | 0.371<br>(0.0516)          | 0.536<br>(0.0035)               |
| 30-day max      |                   |                   |                   |                   |                   |                   |                   |                   | 0.966<br>(0.0000) | 0.631<br>(0.0003) | 0.44<br>(0.0191)           | 0.631<br>(0.0003)               |
| 90-day max      |                   |                   |                   |                   |                   |                   |                   |                   |                   | 0.622<br>(0.0004) | 0.48<br>(0.0100)           | 0.698<br>(0.0000)               |
| April Max<br>Q  |                   |                   |                   |                   |                   |                   |                   |                   |                   |                   | 0.803<br>(0.0000)          | 0.787<br>(0.0000)               |

Table S1. Continued.

|                 | April High<br>Flow Pulse<br>Total D | May<br>Max Q      | May High<br>Flow<br>Pulse # | May High<br>Flow Pulse<br>Max CD | May High<br>Flow Pulse<br>Total D | June<br>Max Q     | June High<br>Flow<br>Pulse # | June High<br>Flow Pulse<br>Max CD | June High<br>Flow Pulse<br>Total D | July<br>Max Q     |
|-----------------|-------------------------------------|-------------------|-----------------------------|----------------------------------|-----------------------------------|-------------------|------------------------------|-----------------------------------|------------------------------------|-------------------|
| RYCS            | 0.504<br>(0.0065)                   | 0.105<br>(0.5930) | 0.19<br>(0.3300)            | 0.154<br>(0.4310)                | 0.168<br>(0.3910)                 | 0.319<br>(0.0969) | 0.109<br>(0.5780)            | 0.334<br>(0.0817)                 | 0.395<br>(0.0374)                  | 0.587<br>(0.0011) |
| April<br>Mean Q | 0.952<br>(0.0000)                   | 0.482<br>(0.0096) | 0.239<br>(0.2180)           | 0.509<br>(0.0059)                | 0.502<br>(0.0067)                 | 0.498<br>(0.0071) | 0.273<br>(0.1580)            | 0.493<br>(0.0079)                 | 0.523<br>(0.0045)                  | 0.664<br>(0.0001) |
| May<br>Mean Q   | 0.538<br>(0.0033)                   | 0.943<br>(0.0000) | 0.677<br>(0.0001)           | 0.927<br>(0.0000)                | 0.938<br>(0.0000)                 | 0.622<br>(0.0004) | 0.578<br>(0.0014)            | 0.712<br>(0.0000)                 | 0.646<br>(0.0002)                  | 0.486<br>(0.0090) |
| June<br>Mean Q  | 0.619<br>(0.0005)                   | 0.643<br>(0.0002) | 0.613<br>(0.0006)           | 0.662<br>(0.0001)                | 0.702<br>(0.0000)                 | 0.941<br>(0.0000) | 0.679<br>(0.0001)            | 0.893<br>(0.0000)                 | 0.945<br>(0.0000)                  | 0.654<br>(0.0002) |
| July<br>Mean Q  | 0.748<br>(0.0000)                   | 0.491<br>(0.0082) | 0.369<br>(0.0531)           | 0.517<br>(0.0051)                | 0.524<br>(0.0044)                 | 0.695<br>(0.0000) | 0.521<br>(0.0047)            | 0.618<br>(0.0005)                 | 0.676<br>(0.0001)                  | 0.932<br>(0.0000) |
| 1-day<br>max    | 0.578<br>(0.0014)                   | 0.656<br>(0.0001) | 0.487<br>(0.0089)           | 0.638<br>(0.0003)                | 0.645<br>(0.0002)                 | 0.586<br>(0.0011) | 0.437<br>(0.0202)            | 0.632<br>(0.0003)                 | 0.604<br>(0.0007)                  | 0.646<br>(0.0002) |
| 3-day<br>max    | 0.583<br>(0.0012)                   | 0.645<br>(0.0002) | 0.456<br>(0.0150)           | 0.623<br>(0.0004)                | 0.628<br>(0.0004)                 | 0.583<br>(0.0012) | 0.426<br>(0.0238)            | 0.632<br>(0.0003)                 | 0.603<br>(0.0007)                  | 0.637<br>(0.0003) |
| 7-day<br>max    | 0.577<br>(0.0014)                   | 0.654<br>(0.0001) | 0.489<br>(0.0085)           | 0.635<br>(0.0003)                | 0.653<br>(0.0002)                 | 0.622<br>(0.0004) | 0.444<br>(0.0183)            | 0.664<br>(0.0001)                 | 0.64<br>(0.0002)                   | 0.637<br>(0.0003) |
| 30-day<br>max   | 0.673<br>(0.0001)                   | 0.662<br>(0.0001) | 0.496<br>(0.0074)           | 0.654<br>(0.0002)                | 0.673<br>(0.0001)                 | 0.621<br>(0.0004) | 0.43<br>(0.0225)             | 0.667<br>(0.0001)                 | 0.645<br>(0.0002)                  | 0.714<br>(0.0000) |
| 90-day<br>max   | 0.741<br>(0.0000)                   | 0.71<br>(0.0000)  | 0.534<br>(0.0036)           | 0.722<br>(0.0000)                | 0.736<br>(0.0000)                 | 0.717<br>(0.0000) | 0.502<br>(0.0067)            | 0.723<br>(0.0000)                 | 0.716<br>(0.0000)                  | 0.778<br>(0.0000) |
| April Max<br>Q  | 0.842<br>(0.0000)                   | 0.315<br>(0.1010) | 0.0916<br>(0.6400)          | 0.349<br>(0.0680)                | 0.343<br>(0.0732)                 | 0.319<br>(0.0969) | 0.108<br>(0.5820)            | 0.275<br>(0.1540)                 | 0.321<br>(0.0951)                  | 0.545<br>(0.0029) |

Table S1. Continued.

|              | July High Flow<br>Pulse # | July High Flow<br>Pulse Max CD | July High Flow<br>Pulse Total D | Spawn Season High<br>Flow Pulse Total D | Spawn Season High<br>Flow Pulse Max CD |
|--------------|---------------------------|--------------------------------|---------------------------------|-----------------------------------------|----------------------------------------|
| RYCS         | 0.434<br>(0.0212)         | 0.587<br>(0.0011)              | 0.606<br>(0.0007)               | 0.515<br>(0.0052)                       | 0.592<br>(0.0010)                      |
| April Mean Q | 0.57<br>(0.0016)          | 0.705<br>(0.0000)              | 0.716<br>(0.0000)               | 0.823<br>(0.0000)                       | 0.79<br>(0.0000)                       |
| May Mean Q   | 0.344<br>(0.0722)         | 0.491<br>(0.0082)              | 0.482<br>(0.0097)               | 0.815<br>(0.0000)                       | 0.709<br>(0.0000)                      |
| June Mean Q  | 0.481<br>(0.0098)         | 0.675<br>(0.0001)              | 0.654<br>(0.0001)               | 0.886<br>(0.0000)                       | 0.774<br>(0.0000)                      |
| July Mean Q  | 0.739<br>(0.0000)         | 0.871<br>(0.0000)              | 0.886<br>(0.0000)               | 0.859<br>(0.0000)                       | 0.734<br>(0.0000)                      |
| 1-day max    | 0.426<br>(0.0242)         | 0.65<br>(0.0002)               | 0.658<br>(0.0001)               | 0.822<br>(0.0000)                       | 0.76<br>(0.0000)                       |
| 3-day max    | 0.412<br>(0.0294)         | 0.639<br>(0.0002)              | 0.647<br>(0.0002)               | 0.818<br>(0.0000)                       | 0.766<br>(0.0000)                      |
| 7-day max    | 0.404<br>(0.0333)         | 0.629<br>(0.0004)              | 0.636<br>(0.0003)               | 0.838<br>(0.0000)                       | 0.785<br>(0.0000)                      |
| 30-day max   | 0.476<br>(0.0107)         | 0.704<br>(0.0000)              | 0.712<br>(0.0000)               | 0.896<br>(0.0000)                       | 0.855<br>(0.0000)                      |
| 90-day max   | 0.579<br>(0.0013)         | 0.781<br>(0.0000)              | 0.785<br>(0.0000)               | 0.947<br>(0.0000)                       | 0.866<br>(0.0000)                      |
| April Max Q  | 0.537<br>(0.0034)         | 0.633<br>(0.0003)              | 0.639<br>(0.0002)               | 0.65<br>(0.0002)                        | 0.61<br>(0.0006)                       |



Table S1. Continued.

|                                  | June High<br>Flow Pulse<br>Max CD | June High<br>Flow Pulse<br>Total D | July<br>Max Q     | July High<br>Flow<br>Pulse # | July High<br>Flow Pulse<br>Max CD | JulyHigh Flow<br>Pulse Total D | Spawn Season<br>High Flow Pulse<br>Total D | Spawn Season<br>High Flow Pulse<br>Max CD |
|----------------------------------|-----------------------------------|------------------------------------|-------------------|------------------------------|-----------------------------------|--------------------------------|--------------------------------------------|-------------------------------------------|
| April High Flow<br>Pulse #       | 0.262<br>(0.1750)                 | 0.344<br>(0.0722)                  | 0.523<br>(0.0045) | 0.518<br>(0.0049)            | 0.523<br>(0.0045)                 | 0.525<br>(0.0043)              | 0.587<br>(0.0011)                          | 0.522<br>(0.0046)                         |
| April High Flow<br>Pulse Max CD  | 0.439<br>(0.0196)                 | 0.499<br>(0.0071)                  | 0.573<br>(0.0015) | 0.534<br>(0.0036)            | 0.647<br>(0.0002)                 | 0.651<br>(0.0002)              | 0.751<br>(0.0000)                          | 0.766<br>(0.0000)                         |
| April High Flow<br>Pulse Total D | 0.486<br>(0.0091)                 | 0.545<br>(0.0028)                  | 0.649<br>(0.0002) | 0.61<br>(0.0006)             | 0.739<br>(0.0000)                 | 0.747<br>(0.0000)              | 0.794<br>(0.0000)                          | 0.762<br>(0.0000)                         |
| May Max Q                        | 0.685<br>(0.0000)                 | 0.618<br>(0.0005)                  | 0.412<br>(0.0296) | 0.29<br>(0.1330)             | 0.425<br>(0.0242)                 | 0.425<br>(0.0242)              | 0.75<br>(0.0000)                           | 0.629<br>(0.0003)                         |
| May High Flow<br>Pulse #         | 0.576<br>(0.0014)                 | 0.583<br>(0.0012)                  | 0.293<br>(0.1290) | 0.0551<br>(0.7770)           | 0.285<br>(0.1400)                 | 0.273<br>(0.1570)              | 0.602<br>(0.0007)                          | 0.538<br>(0.0033)                         |
| May High Flow<br>Pulse Max CD    | 0.711<br>(0.0000)                 | 0.65<br>(0.0002)                   | 0.438<br>(0.0198) | 0.267<br>(0.1670)            | 0.478<br>(0.0104)                 | 0.473<br>(0.0112)              | 0.78<br>(0.0000)                           | 0.651<br>(0.0002)                         |
| May High Flow<br>Pulse Total D   | 0.73<br>(0.0000)                  | 0.684<br>(0.0000)                  | 0.442<br>(0.0188) | 0.269<br>(0.1640)            | 0.492<br>(0.0080)                 | 0.479<br>(0.0102)              | 0.797<br>(0.0000)                          | 0.668<br>(0.0001)                         |
| June Max Q                       | 0.879<br>(0.0000)                 | 0.952<br>(0.0000)                  | 0.644<br>(0.0002) | 0.543<br>(0.0029)            | 0.694<br>(0.0000)                 | 0.663<br>(0.0001)              | 0.805<br>(0.0000)                          | 0.632<br>(0.0003)                         |
